# Supplementary figures and images for: Population structure and connectivity in the Mediterranean sponge Ircinia fasciculata are affected by mass mortalities and hybridization
Source: PubMed Central journal article supplement — Heredity (Edinb). 2016 Sep 7;117(6):427–39. doi: 10.1038/hdy.2016.41 (PMC5117837; doi:10.1038/hdy.2016.41), 2016-09-07

**A**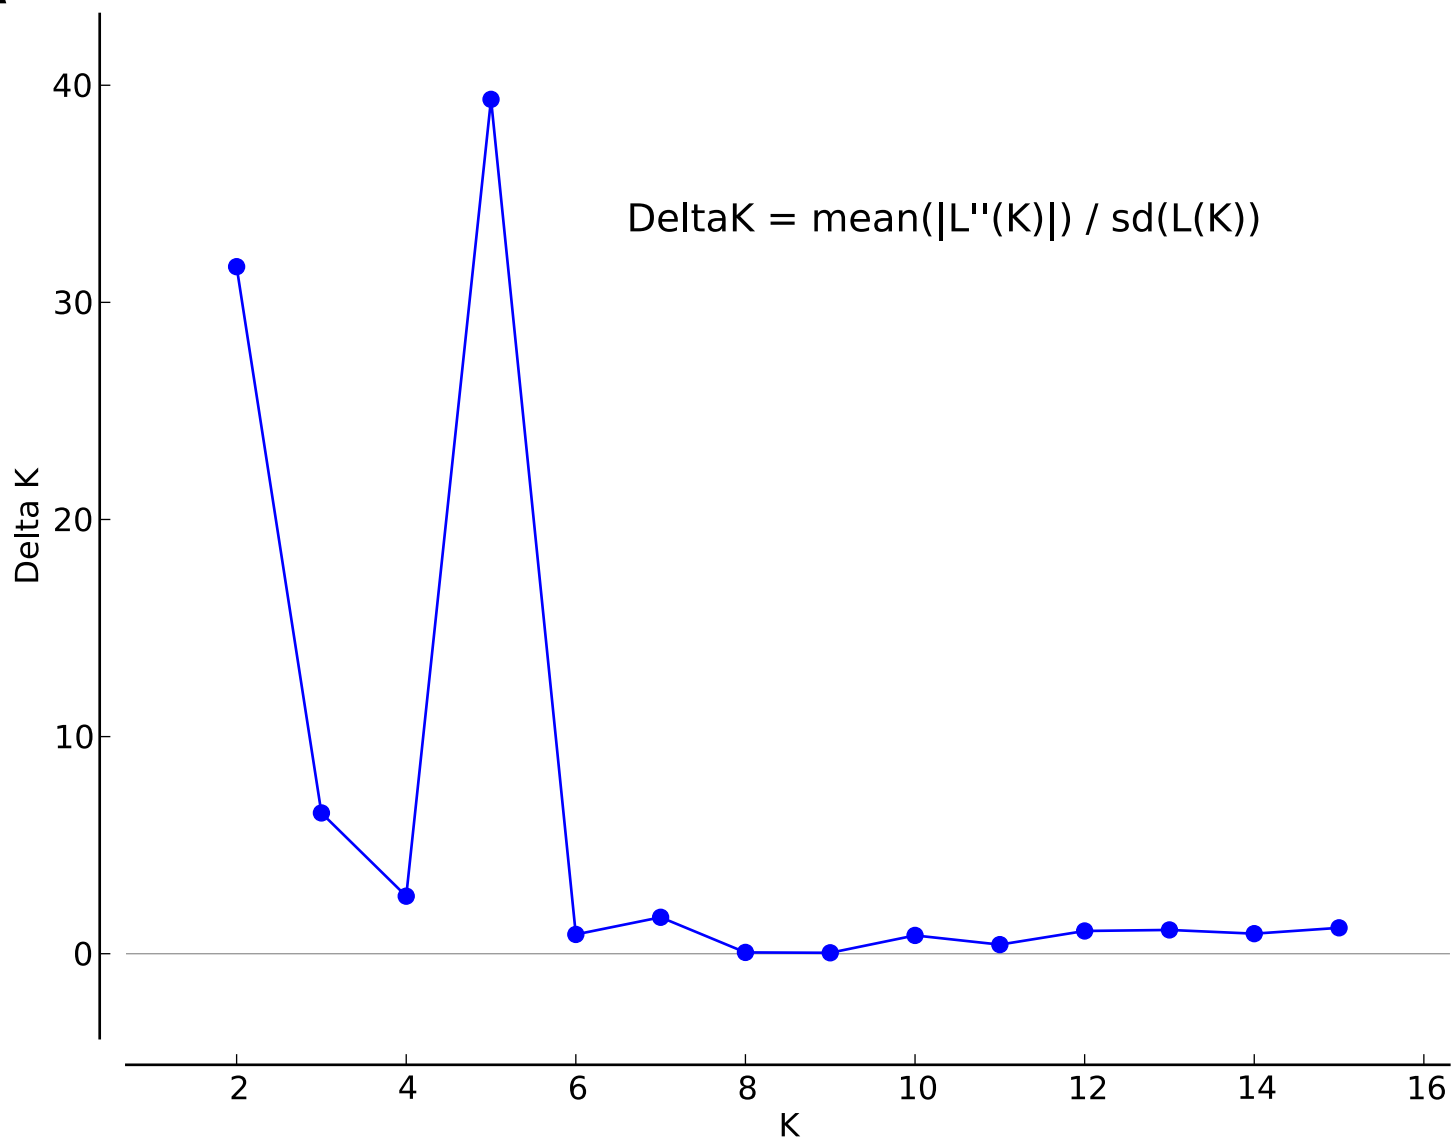**B**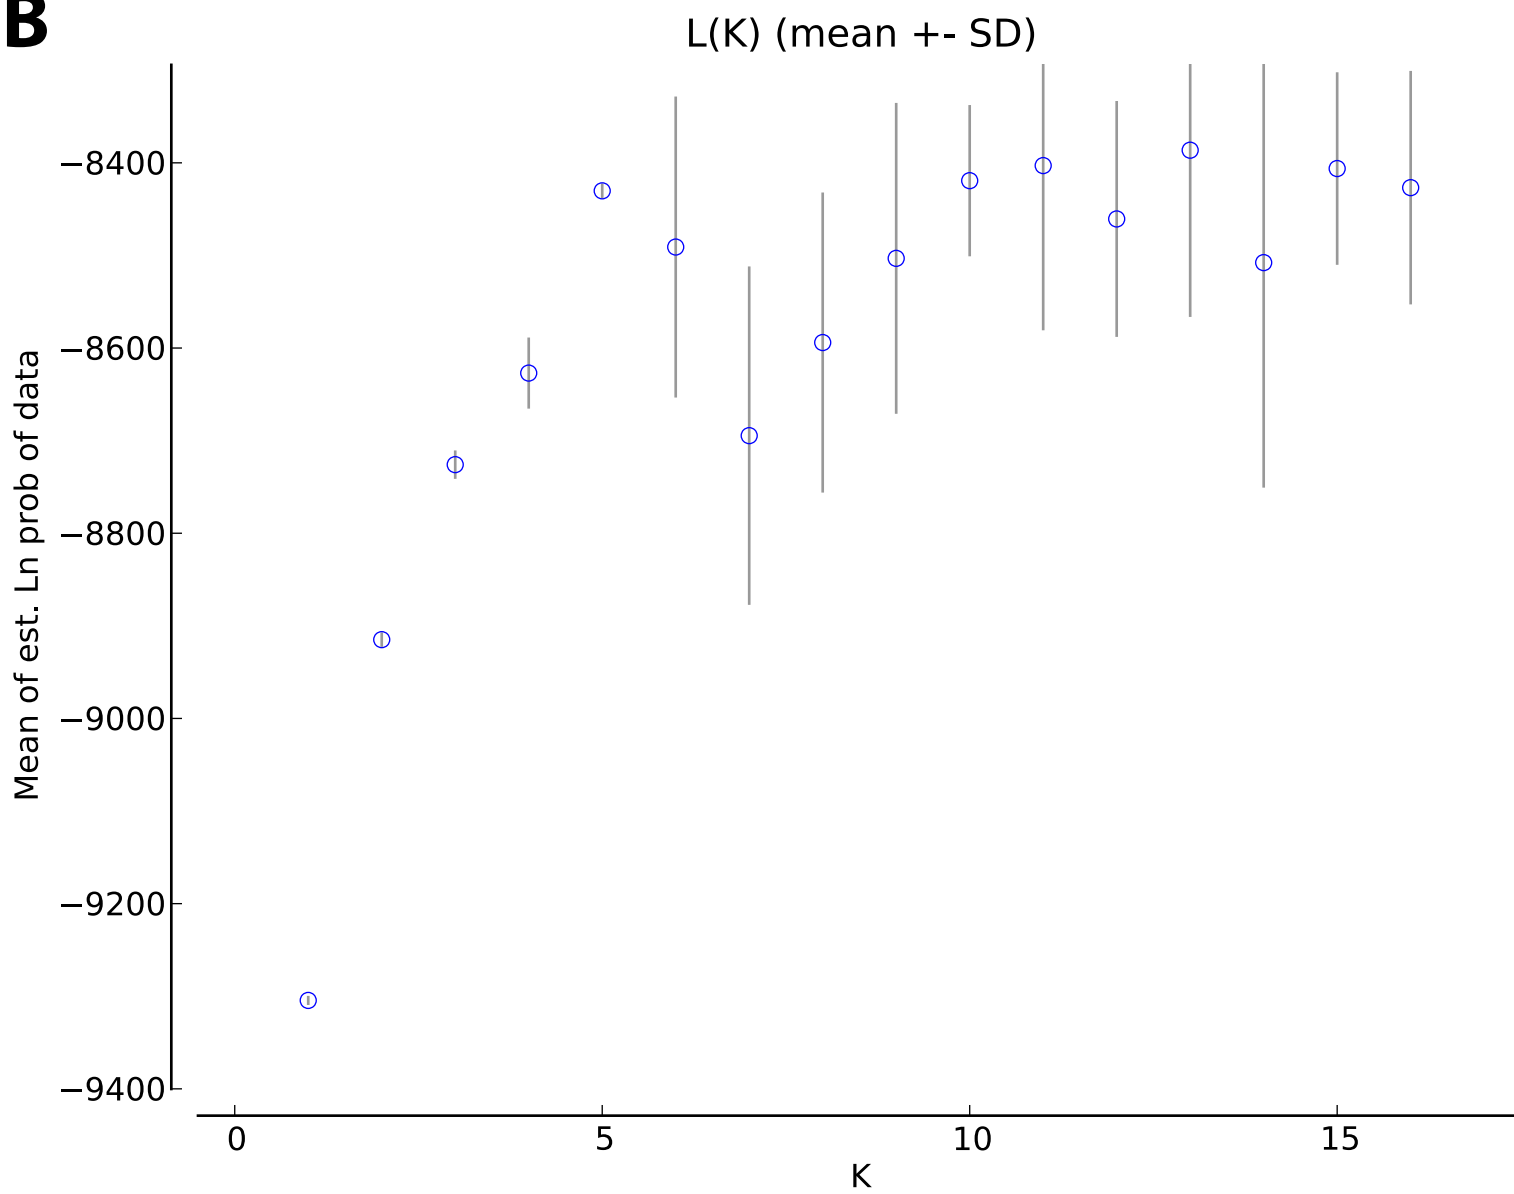

Supplement: hdy201641x1.pdf [file hdy201641x1.pdf]
